# Supplementary material
Source: ML conference proceedings conference paper supplement (https://openreview.net/forum?id=9eIntNc69t)
Supplement: supplementary_material [file Memo_trajectories.pdf › Memo_trajectories.pdf]

Each following page shows the success rate of the model at different time-steps during an in-context rollout within a novel scene (shown in both third person and birds eye view). Path taken by agent is highlighted in blue.

It can be seen that as a model collects more experience it starts to take the shortest paths to (the same) goals sampled at different points in time.

It can also be seen that when it goes significantly beyond it's training context length (4k), it performance starts to degrade again.

Mug

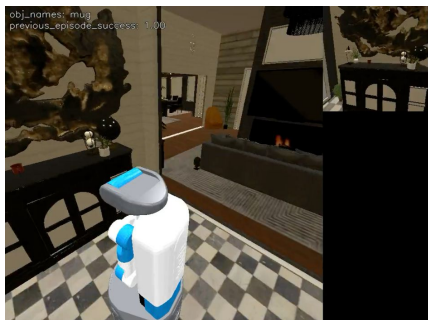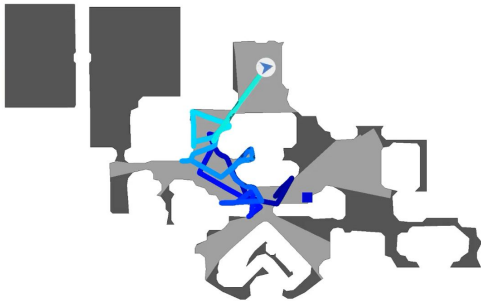

Success  
Num steps=3874

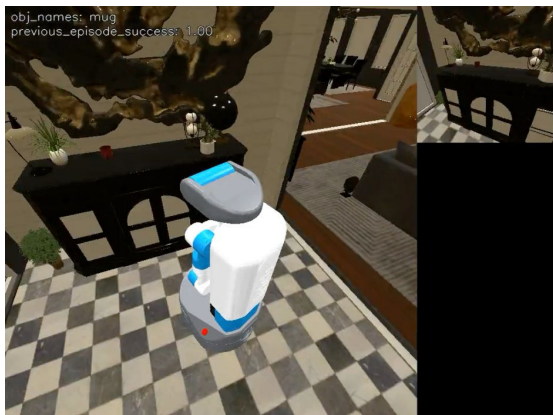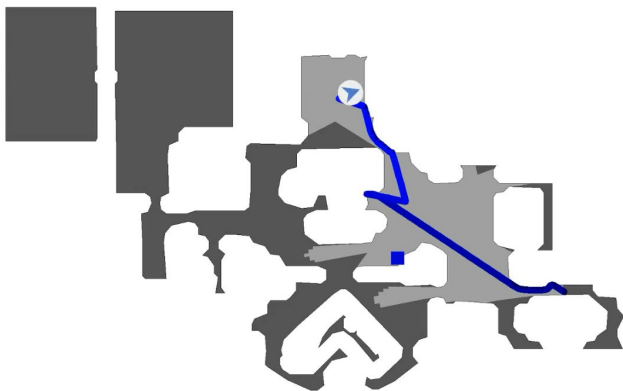

Success  
Num steps=4530

obj\_names: mug  
previous\_episode\_success: 1.00

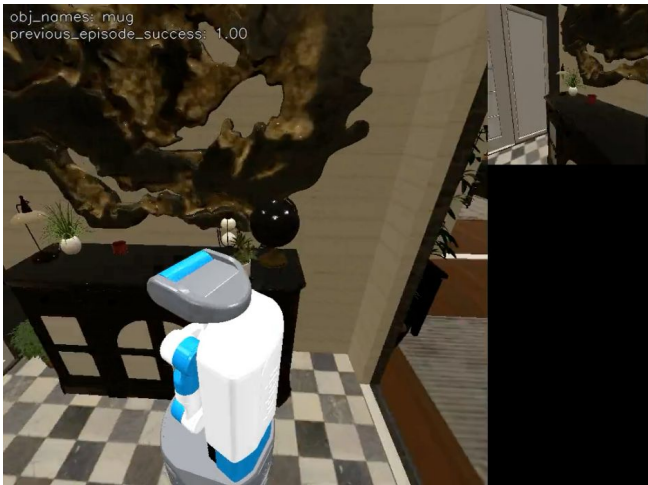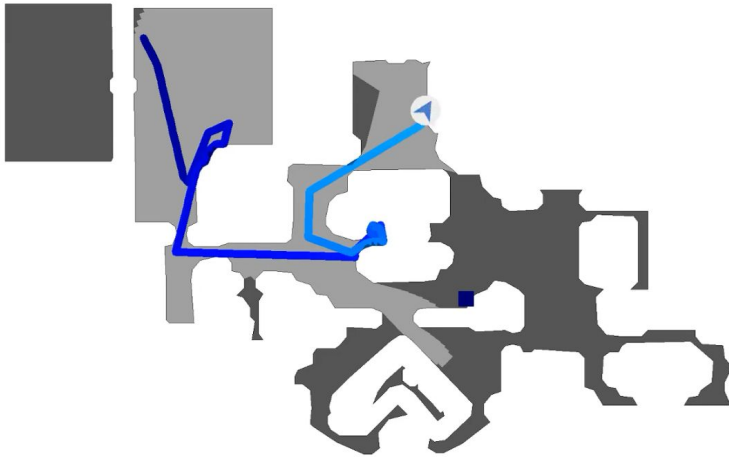

Success  
Num steps=5066

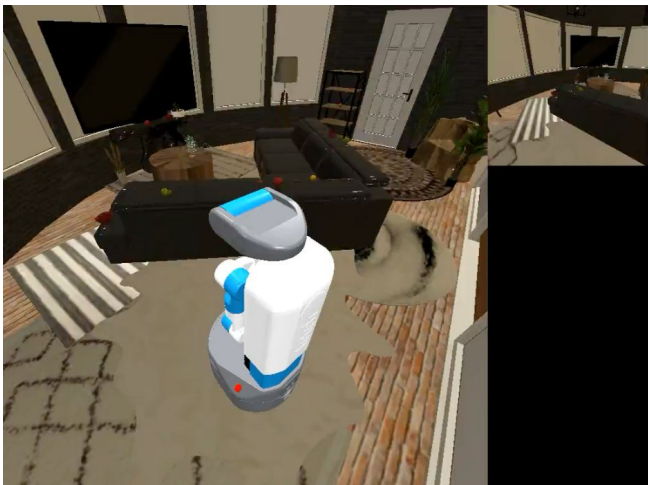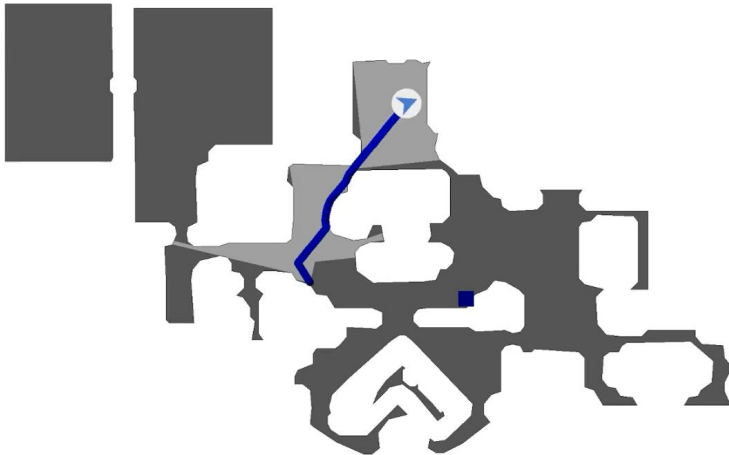

Success  
Num steps=6168

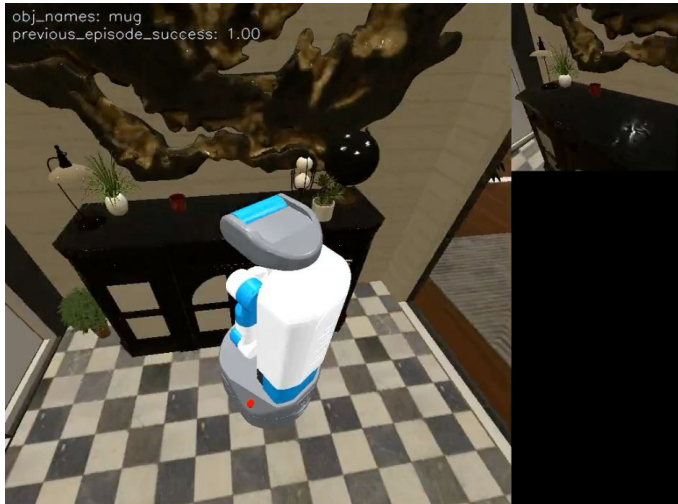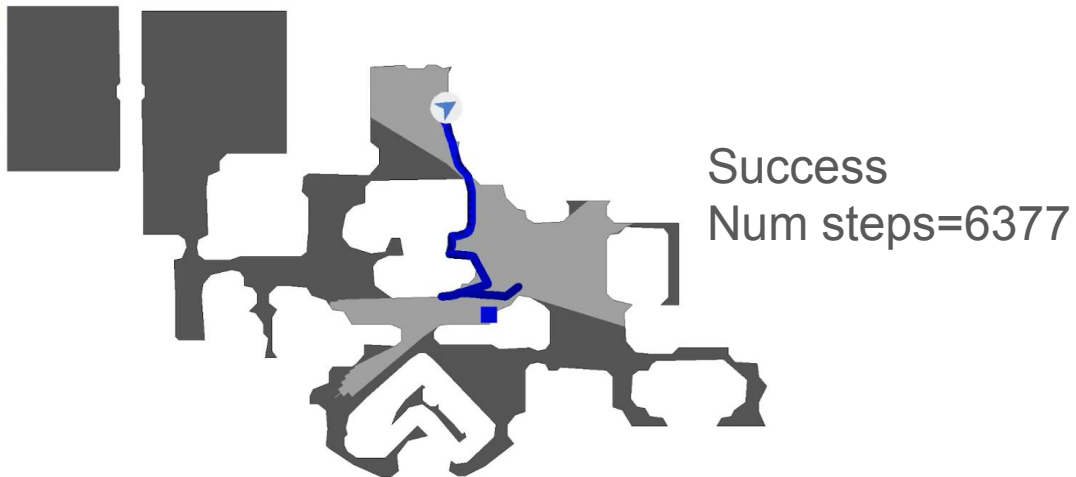

Gelatin Box

# Gelatin Box

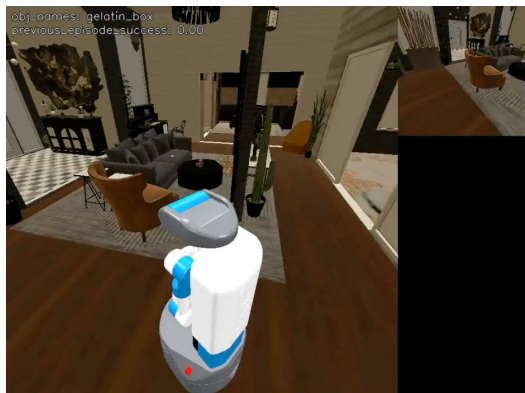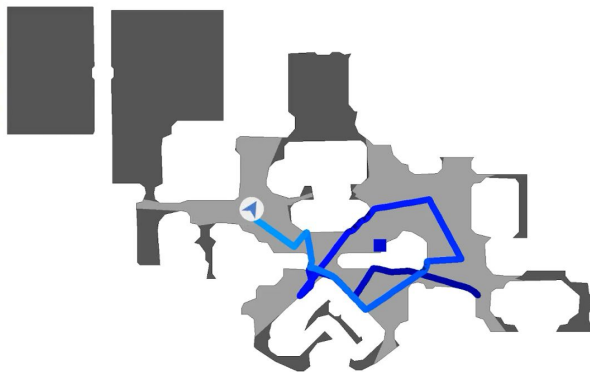

Failure  
Num steps=387

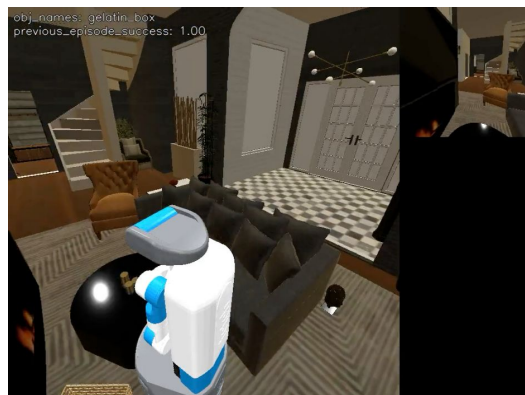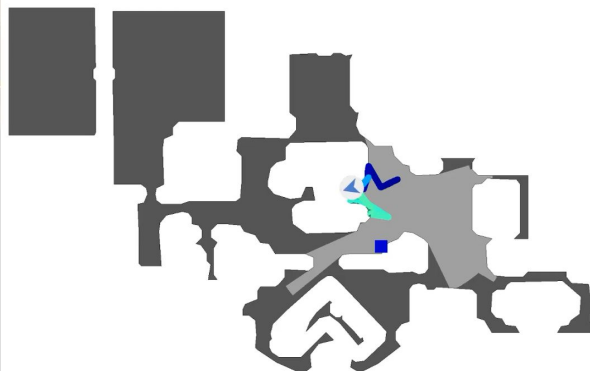

Failure  
Num steps=955

Agent fails to find the gelatin box in the scene

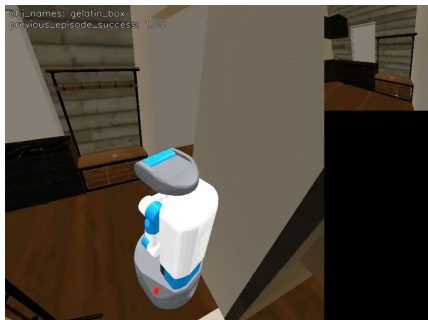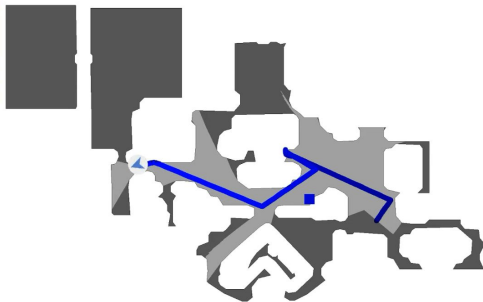

Success  
Num steps=1332

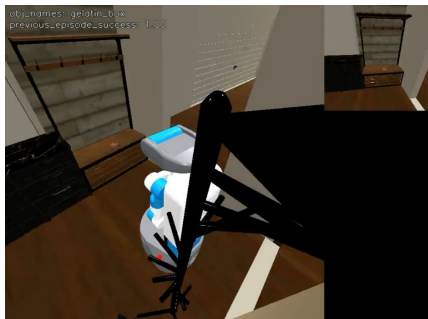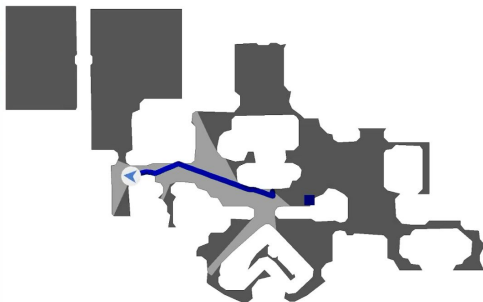

Success  
Num steps=5453

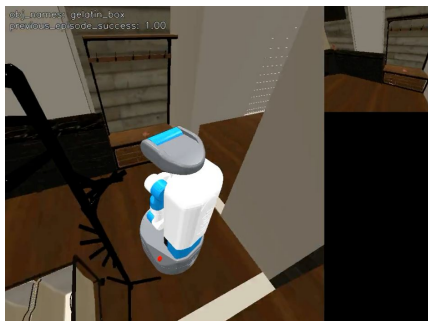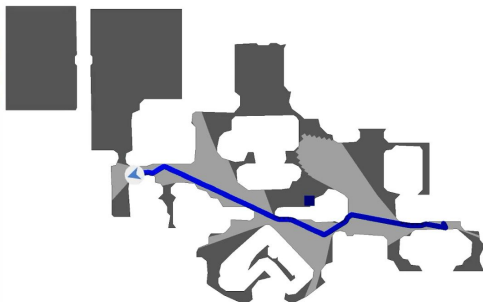

Success  
Num steps=7660

Agent finds the gelatin box and navigates to it successfully



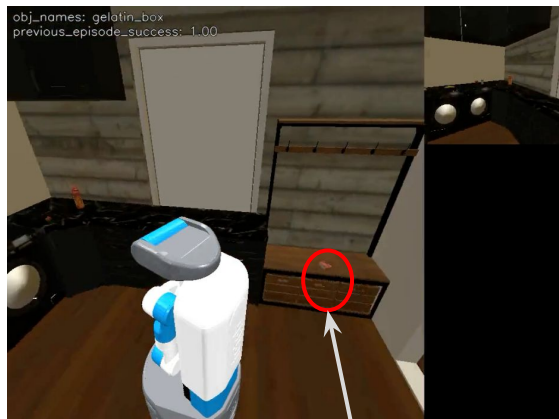

Agent not looking  
at the object

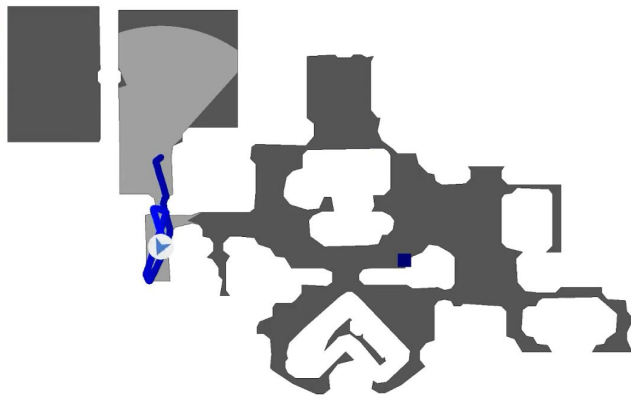

Failure  
Num steps=8760

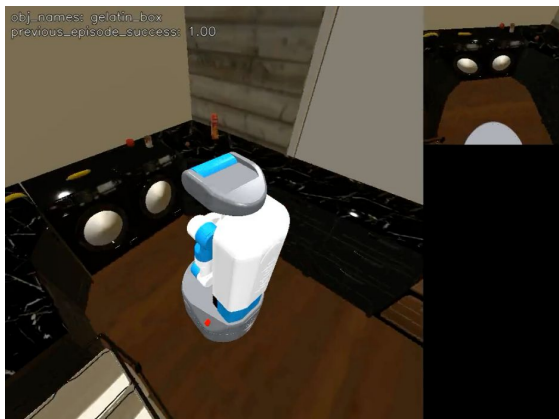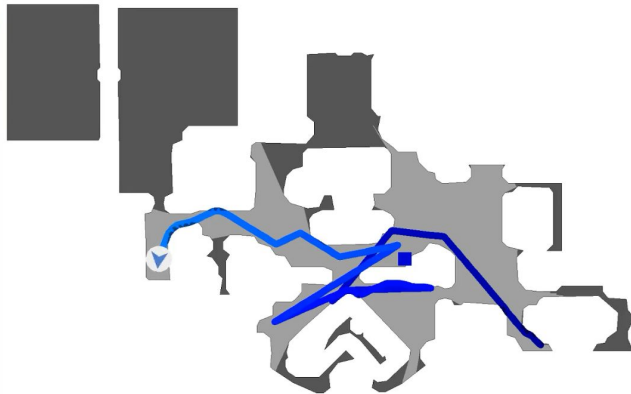

Failure  
Num steps=9327
